# Supplementary material
Source: MDPI journal article supplement (https://www.mdpi.com/2073-4344/9/11/888)
Supplement: s1 [file s1]

## Supplementary Materials

# Facile Fabrication of Metal Oxide Based Catalytic Electrodes by AC Plasma Deposition and Electrochemical Detection of Hydrogen Peroxide

Quang-Tan Bui <sup>1</sup>, In-Keun Yu <sup>2</sup>, Anantha Iyengar Gopalan <sup>3</sup>, Gopalan Saianand<sup>4</sup>, Woonjung Kim <sup>1,\*</sup> and Seong-Ho Choi <sup>1,\*</sup>

<sup>1</sup> Department of Chemistry, Hannam University, Daejeon 34054, Republic of Korea; buiquangtan.bka@gmail.com

<sup>2</sup> Plasma Technology Research Center, National Fusion Research Institute (NFRI), Gunsan 54004, Republic of Korea; ikyu@nfri.re.kr

<sup>3</sup> Daeyong Regional Infrastructure Technology Development Center, Kyungpook National University; Daegu, South Korea; algopal99@gmail.com

<sup>4</sup> School of Engineering, Faculty of Engineering and Built Environment, The University of Newcastle; Callaghan, NSW 2308, Australia; Saianand.Gopalan@newcastle.edu.au

\* Correspondence: wjkim@hnu.kr (W.K.); Tel.: +82-42-629-8939; shchoi@hnu.kr (S-H.C.); Tel.: +82-42-629-8824

Received: 11 October 2019; Accepted: 22 October 2019; Published: date

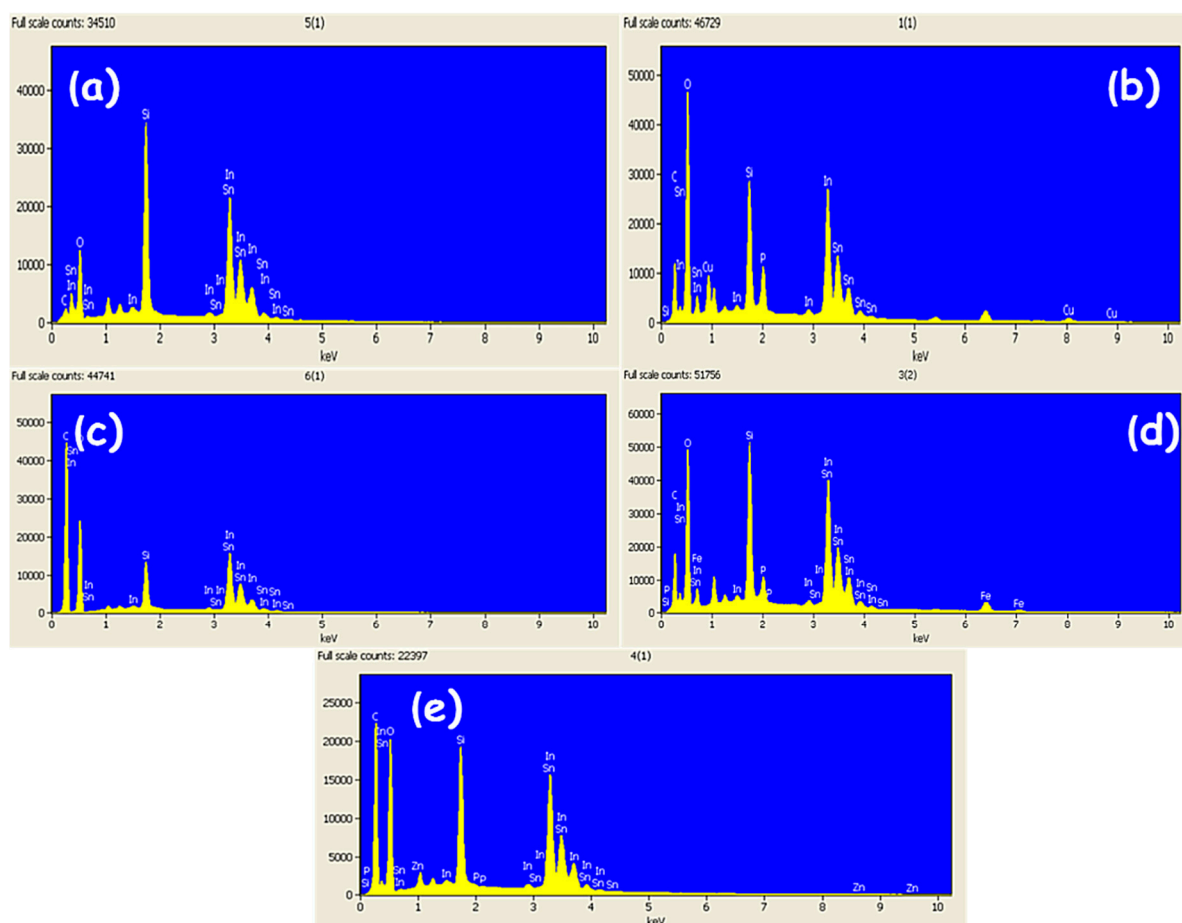

**Figure S1.** EDS of the bare (a) ITO, (b) PAA, (c) CuO-PAA, (d) Fe<sub>2</sub>O<sub>3</sub>-PAA and (e) ZnO-PAA/ITO electrodes.

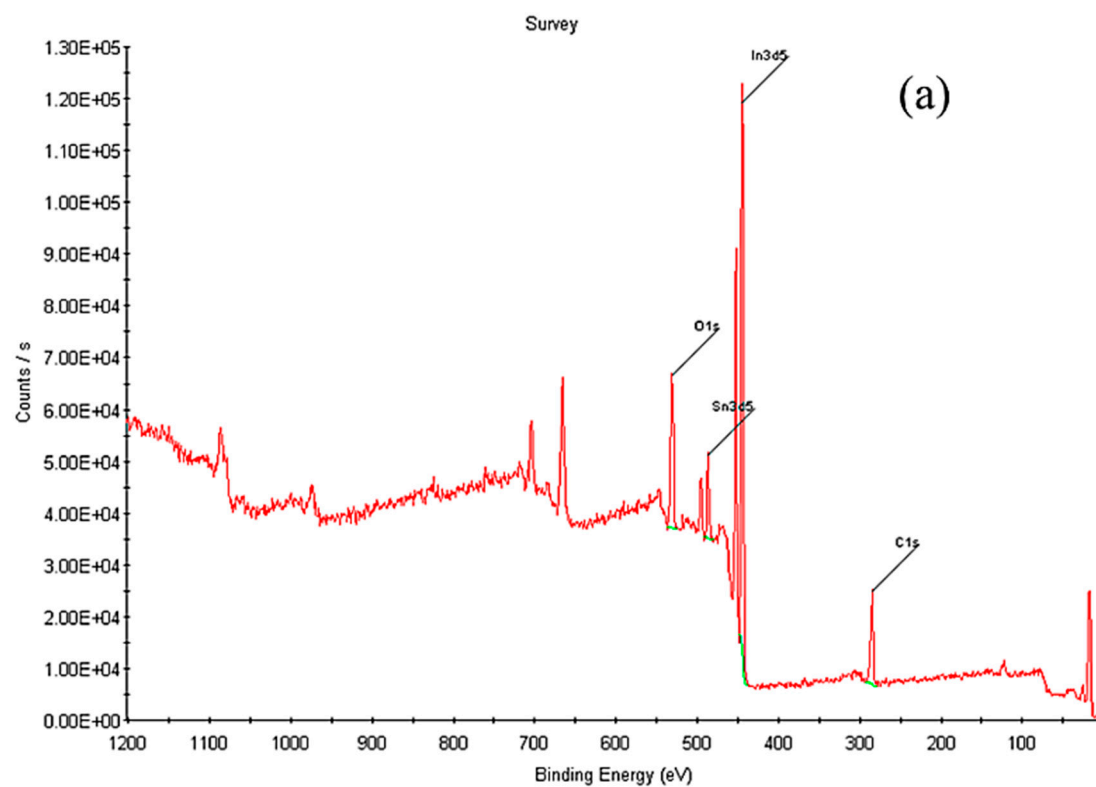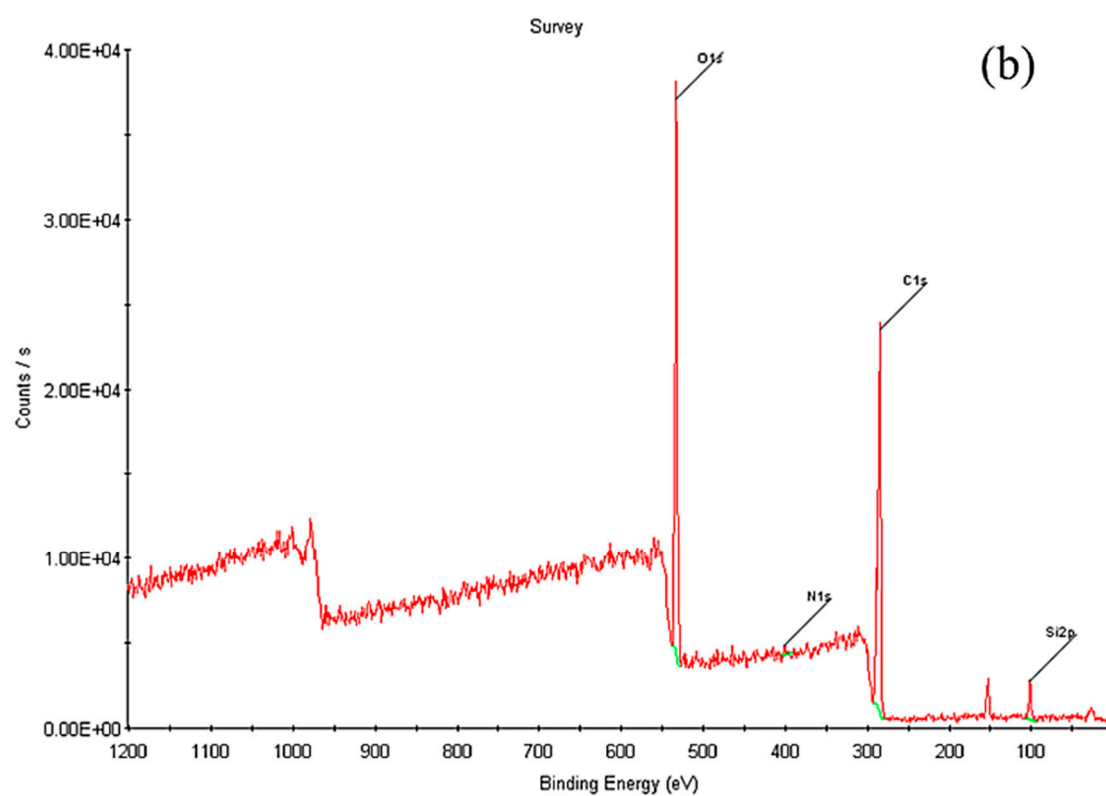

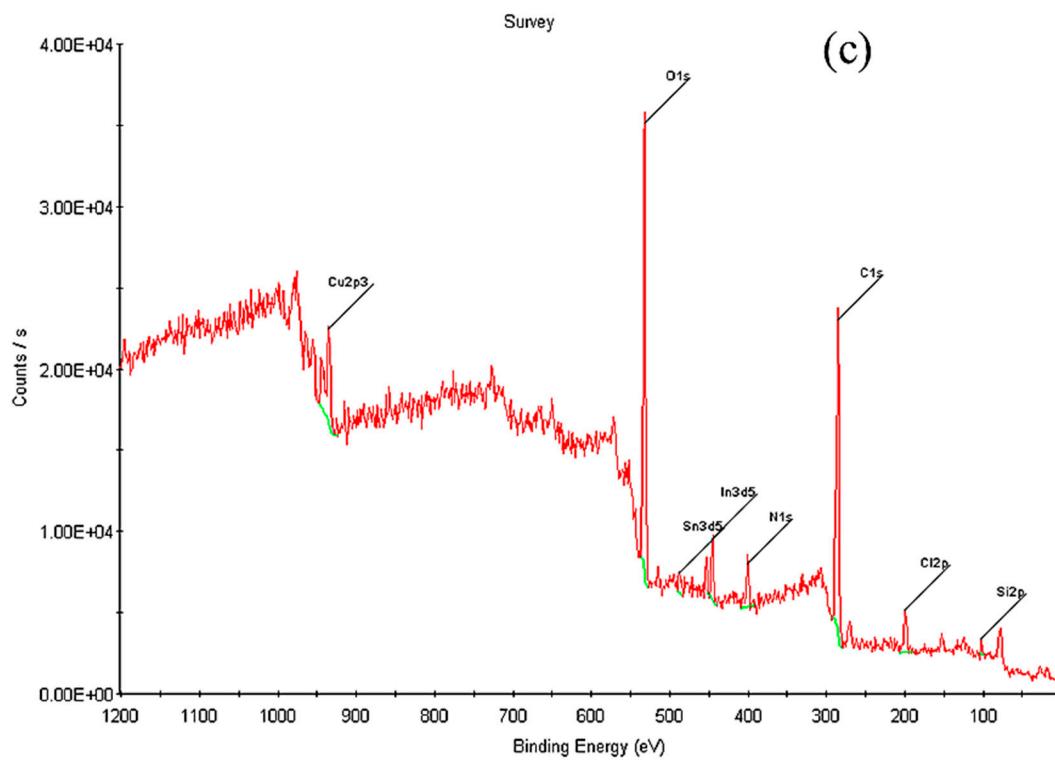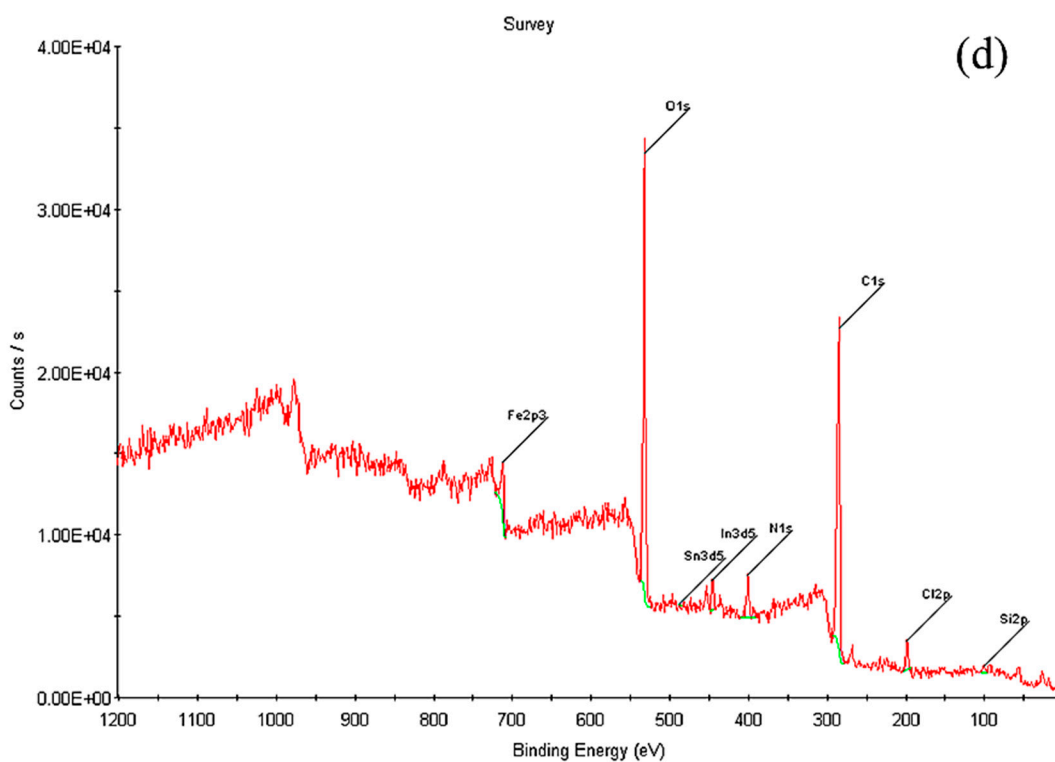

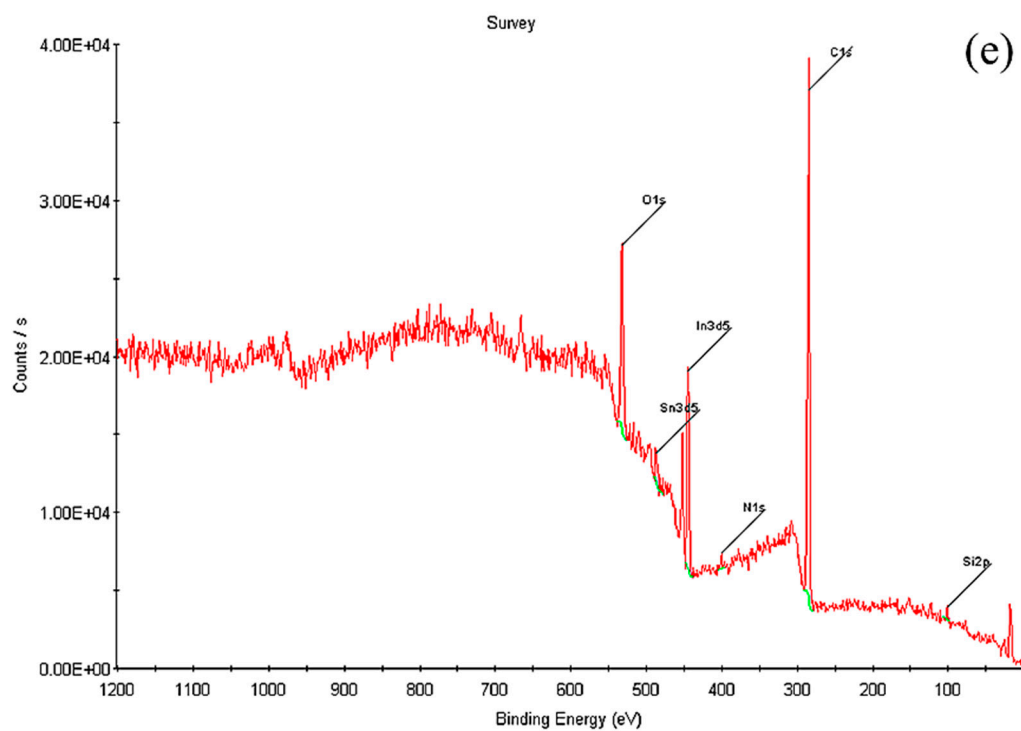

**Figure S2.** XPS spectra of the bare ITO (a), PAA (b), CuO-PAA (c), Fe<sub>2</sub>O<sub>3</sub>-PAA (d) and ZnO-PAA/ITO electrodes (e).

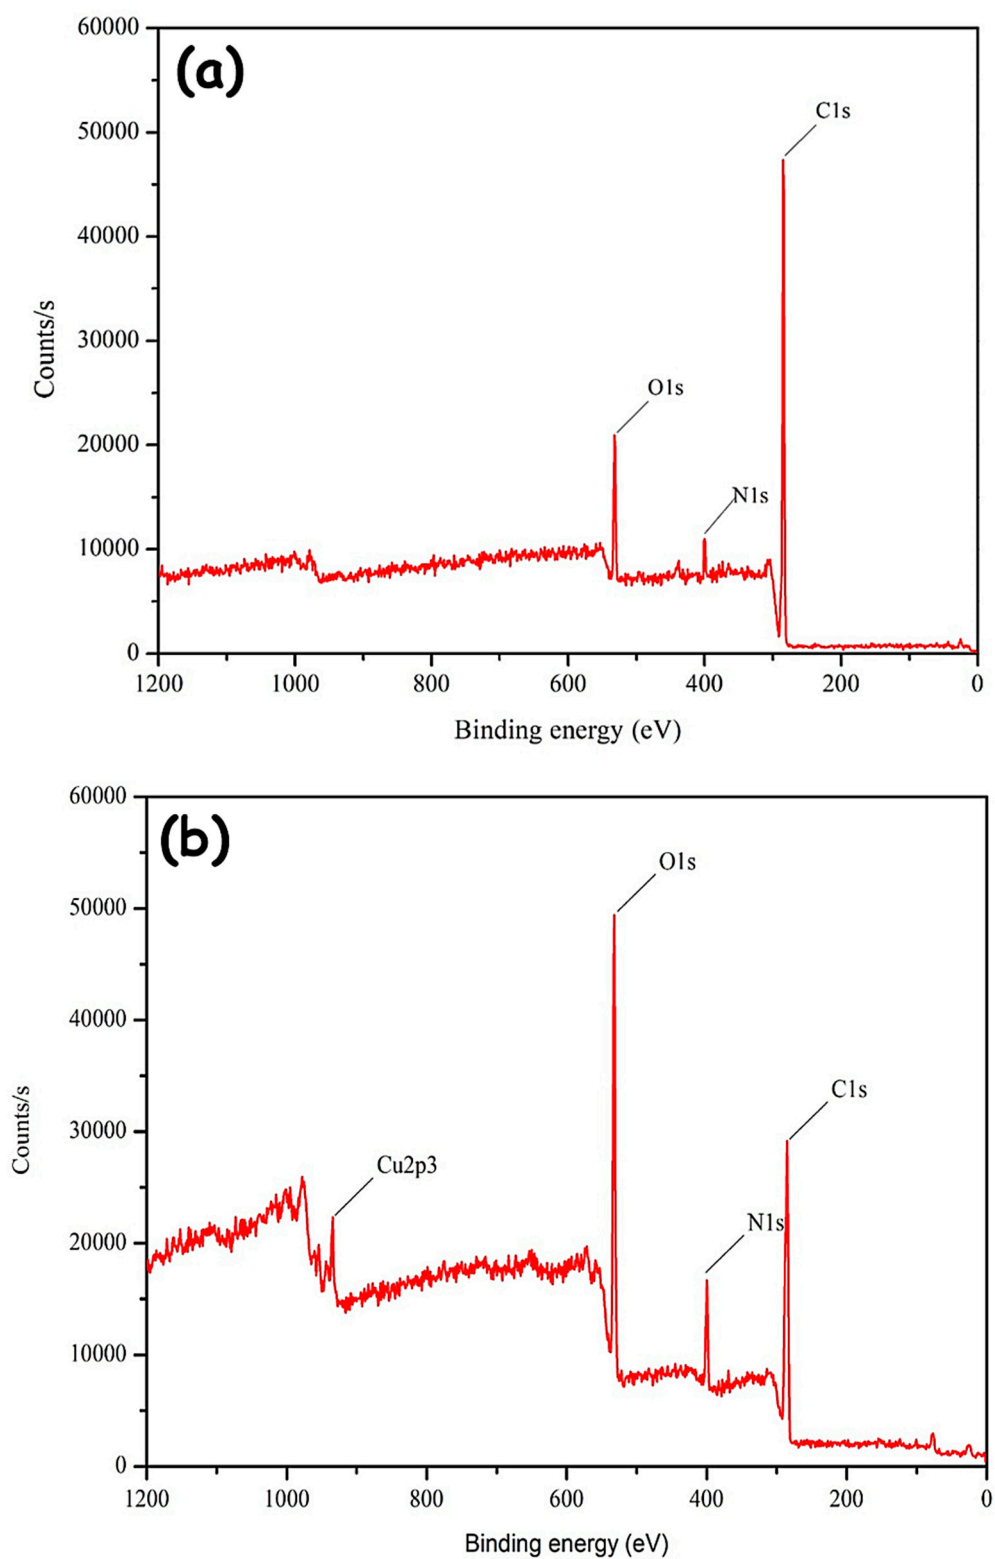

**Figure S3.** XPS spectra of (a) MBA-PAA and (b) CuO-MBA-PAA/ITO electrode.
